# Supplementary material for: Improved Catalytic Performance of Lipase Eversa® Transform 2.0 via Immobilization for the Sustainable Production of Flavor Esters—Adsorption Process and Environmental Assessment Studies
Source: MDPI journal article supplement (doi:10.3390/catal12111412), 2022-11-11
Supplement: s1 [file s1]

# **Supplementary Material**

**Improved Catalytic Performance of Lipase Eversa® Transform 2.0  
via Immobilization for the Sustainable Production of Flavor  
Esters – Adsorption Process and Environmental Assessment  
Studies**

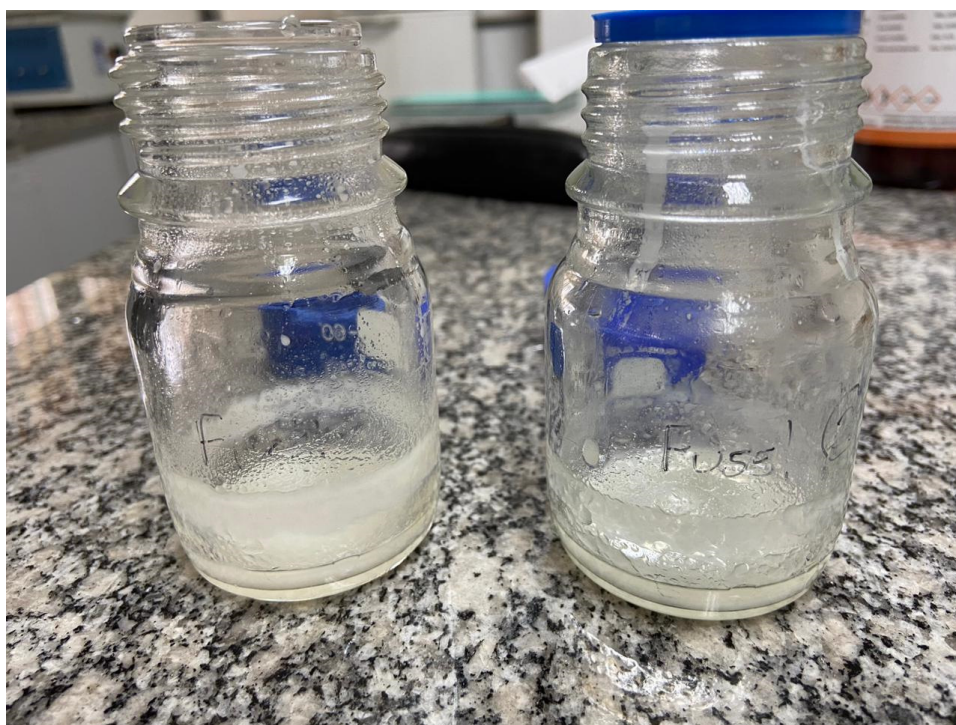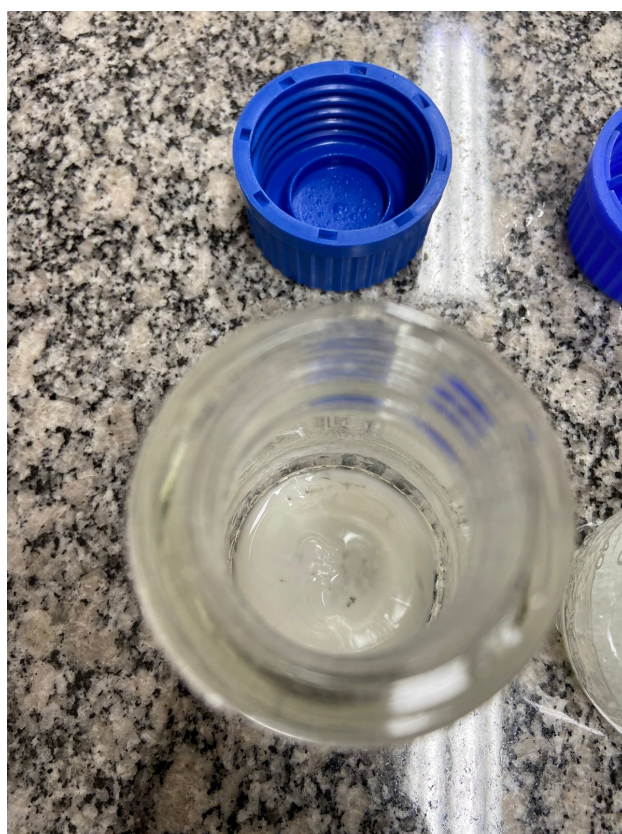

**Figure S1.** Illustration of the reaction mixture at equilibrium for esterification of fusel oil and octanoic acid catalyzed by soluble lipase.
