# Supplementary material for: Improved Catalytic Performance of Lipase Eversa® Transform 2.0 via Immobilization for the Sustainable Production of Flavor Esters—Adsorption Process and Environmental Assessment Studies
Source: MDPI journal article supplement (doi:10.3390/catal12111412), 2022-11-11
Supplement: s1 [file s1]

Archive with 1 entries (1 files):
- catalysts-2007278-supplementary.pdf
